# Supplementary material for: Unbalanced relationship between flood risk perception and flood preparedness from the perspective of response intention and socio-economic factors: a case study of Nanjing, China
Source: Copernicus journal article supplement (doi:10.5194/nhess-2024-23), 2024-05-14
Supplement: Supplementary file [file nhess-2024-23-AC2-supplement.pdf]

## Details of reply

Dear reviewers,

We would like to thank the reviewers for his/her interest in our work for their effort, constructive criticism and suggestion. We appreciate the insightful comments, as these would contribute to improving the clarity our manuscript. We provide a point-by-point reply to the general and specific comments raised as follows:

### **REVIEWER 2:**

Thank you for the opportunity to review the manuscript. The paper needs some improvement before it can be considered for publication. Here are my comments:

1. avoid the word "natural disasters". Disasters are not natural. please refer to IPCC or UNDRR reports.

**Reply: Thank you for your suggestions, and we would avoid this expression in the paper.**

2. The LR needs improvement. Please see Rana et al. 2020. Characterizing flood risk perception in urban communities of Pakistan. The paper reviews theories on flood risk perception. See some more references at the end for improving this section.

**Reply: Thanks a lot, we would consider these references carefully and modify this section better in this paper.**

3. Why is district taken as a socioeconomic factor? Maybe drop it from the analysis? Mean of district doesn't make sense too.

**Reply: Thanks a lot, and this study focused on the urban center of Nanjing including six districts: Gulou, Xuanwu, Jianye, Qinhuai, Qixia and Yuhuatai district respectively. Based on Nanjing Statistical Yearbook, there were socioeconomic differences in these districts, and therefore, we considered it as a socioeconomic factor and mainly used it to reveal the socioeconomic differences of survey respondents in the regional distribution.**

4. Figure 3. Some values of significant correlation are missing in the figure.

**Reply: Thanks greatly for your valuable suggestions. We would check again and redraw this figure 3 carefully.**

5. Please add a model of fitness for regression results.

**Reply: Thanks a lot for your suggestions. The R-square value is a statistic that measures the goodness of fit of a regression model and indicates how well the regression model fits the observed values. The R square value ranges from 0 to 1, and the greater the R square value, the better the regression model fits the observed value. The adjusted R<sup>2</sup> is the correction of R<sup>2</sup>, and the adjusted R<sup>2</sup> considers the number of independent variables and the influence of sample size to avoid the problem of over-fitting. RMSE is the most commonly used evaluation model index in regression models. The closer the RMSE value is to 0, the better the model fitness. We would add more descriptions about the fitness of regression analysis in this paper.**

6. The manuscript is too long, maybe cut down on Mann, Kruskal-Wallis tests etc. Regression is the main thing in this paper.

**Reply: Thanks a lot for your advice and correction. Mann-Whitney U and Kruskal-Wallis tests were used to compare the differences of flood risk perception and flood preparedness between variable groups in this study. And we would make this section more concise.**

Overall, the paper is technically sound but needs a little improvement in language and flow. Minor

revisions are suggested.

Minor comments:

1. Need grammar check. Especially figures and abstracts.

**Reply: Thanks a lot for your advice and correction. We will check the grammar, improve the language and flow again and adjust the figures and abstracts in this paper.**

2. L16 Flood, not food

**Reply: Thanks for this correction, and we will adjust this word accordingly.**

3. Figure 5. Flood preparedness. Check spelling.

**Reply: Thanks for your correction, and we will adjust this figure accordingly.**

References to consult:

- <https://doi.org/10.1016/j.ijdr.2016.08.028>
- <https://doi.org/10.1016/j.ijdr.2019.101427>
- <https://doi.org/10.1016/j.jenvman.2022.115309>
- <https://doi.org/10.1080/17477891.2023.2220947>

I wish the authors well with the revision. Good luck.

**Reply: Thanks a lot, we appreciate your positive assessment of our study and will consider these references in this paper.**
